# Supplementary material for: Enzyme mimicking inorganic hybrid Ni@MnO2for colorimetric detection of uric acid in serum samples
Source: Royal Society of Chemistry journal article supplement (doi:10.1039/c6ra11483k), 2016-01-01
Supplement: c6ra11483k1.pdf [file c6ra11483k1.pdf]

## **Electronic supplementary information (ESI)**

### **Enzyme mimicking inorganic hybrid Ni@MnO<sub>2</sub> for colorimetric detection of uric acid in serum sample**

**Jaya Pal and Tarasankar Pal\***

Department of Chemistry, Indian Institute of Technology, Kharagpur-721302, India

**E-mail: tpal@chem.iitkgp.ernet.in**

#### **Catalytic Reduction of 4-Nitrophenol by Using Ni@MnO<sub>2</sub>.**

Typically, 300  $\mu\text{L}$  of  $5 \times 10^{-2}$  M freshly prepared aqueous NaBH<sub>4</sub> solution was mixed with 3 mL aqueous solution of 4-nitrophenol ( $1 \times 10^{-4}$  M) in a quartz cuvette under ambient condition. Then 1 mg of Ni@MnO<sub>2</sub> nanocatalyst was added to the reaction mixture and the progress of the reactions was recorded using a UV-vis spectrophotometer.

#### **Sample Preparation for Surface-Enhanced Raman Scattering (SERS) Study.**

In a typical procedure, 0.015 g of Ni@MnO<sub>2</sub> hybrid nanomaterials were dispersed in 1 mL of the stock solution of 1,10-phenanthroline ( $10^{-5}$  M ethanolic solution) and this substrate-probe assembly was incubated for 2 days. Then the materials were taken on microscope slides, and dried to evaporate the solvent for SERS measurements using He-Ne laser (632.8 nm).

Figure

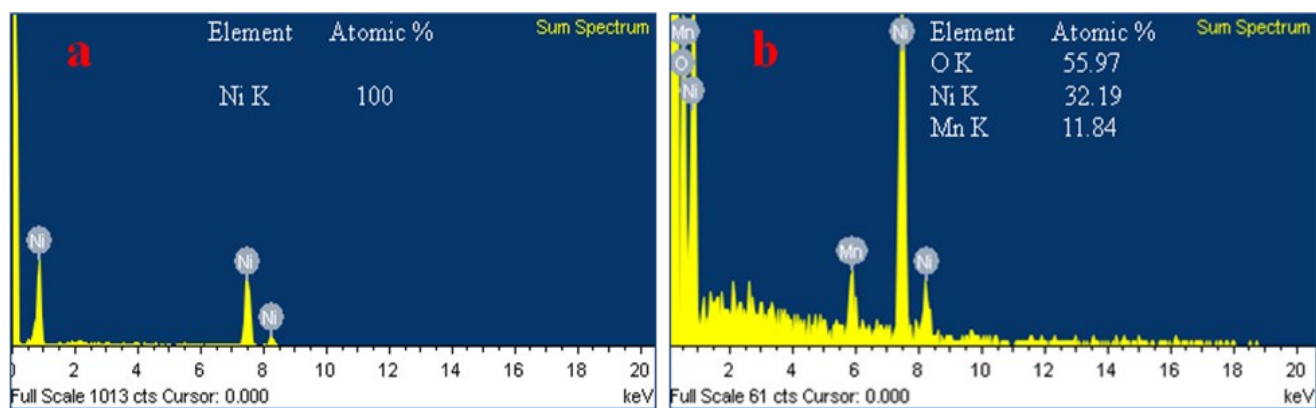

Fig. S1 EDX analysis of (a) Ni NW and (b) Ni@MnO<sub>2</sub> hybrid nanomaterials, respectively.

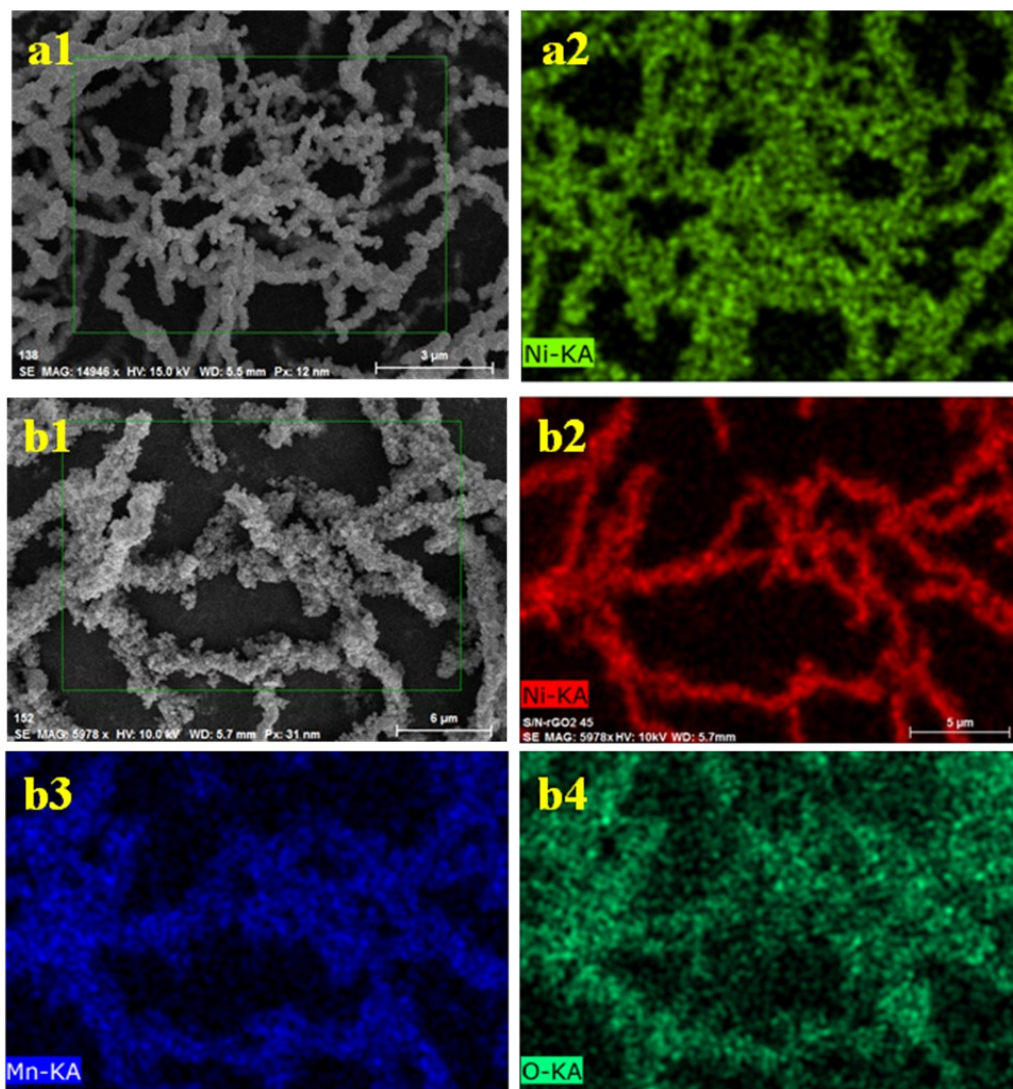

**Fig. S2** Area mapping of as-prepared (a1) prickly Ni NW: for the element Ni (a2). Area mapping of (b1) Ni-MnO<sub>2</sub> hybridnanomaterial: for the element Ni (b2), Mn (b3) and O (b4).

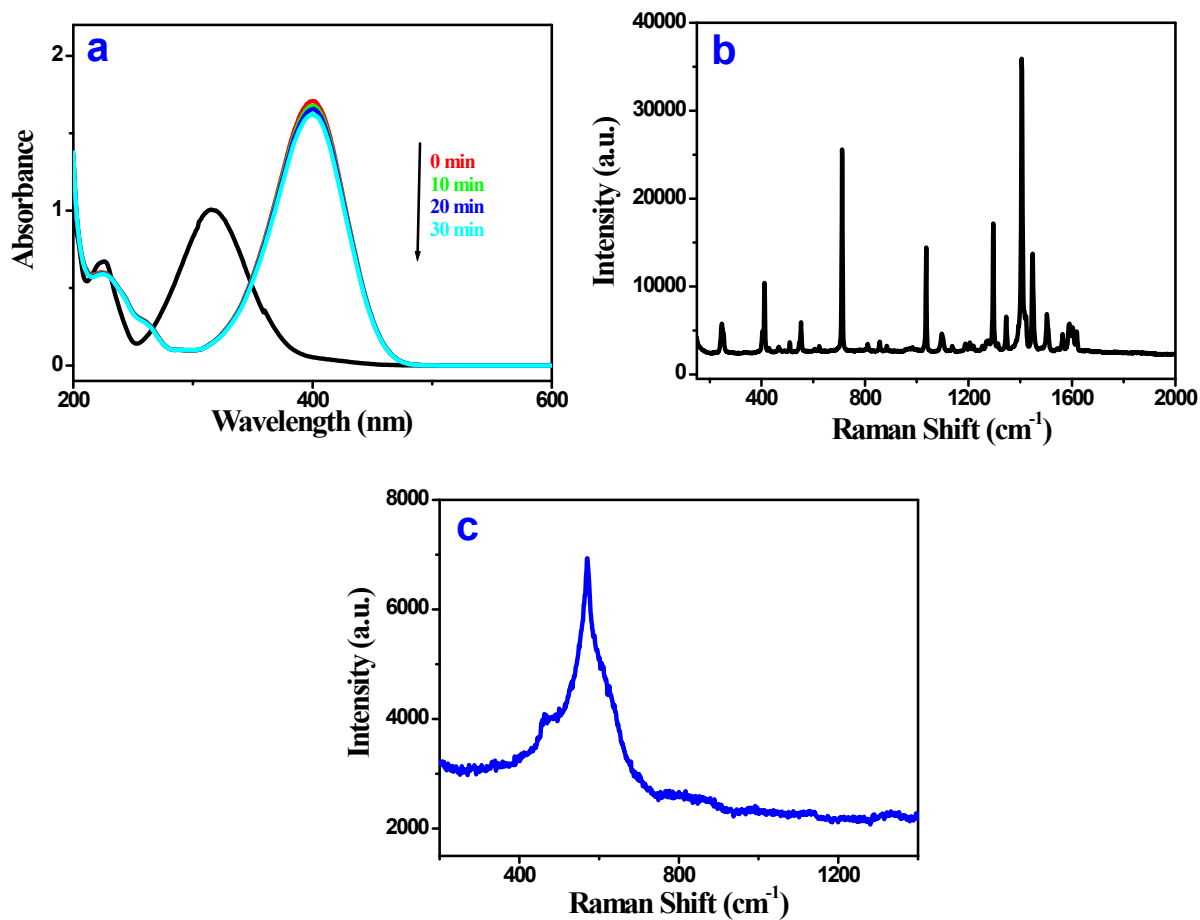

**Fig. S3** (a) UV-visible absorption spectra of the reduction of 4-nitrophenol by NaBH<sub>4</sub> in presence of 1 mg of Ni@MnO<sub>2</sub> catalyst. (b) Normal Raman spectra of 1,10-phenanthroline in solid state and (c) SERS spectra of 10<sup>-5</sup> M 1,10-phenanthroline over Ni@MnO<sub>2</sub> nanoparticles.
